# Supplementary material for: Proteasome-mediated degradation of IκBα and processing of p105 in Crohn disease and ulcerative colitis
Source: JCI journal article supplement (doi:10.1172/jci28804), 2006-11-22
Supplement: sd1 [file 1]

**Supplemental Table 1**

| Subunits   | controls | UC noninflamed | UC inflamed | CD noninflamed | CD inflamed |
|------------|----------|----------------|-------------|----------------|-------------|
| $\beta 1$  | +++      | ++             | ++          | ++             | +           |
| $\beta 1i$ | +        | ++             | ++          | ++             | +++         |
| $\beta 2$  | +++      | ++             | ++          | ++             | +           |
| $\beta 2i$ | -        | -              | -           | -              | ++          |
| $\beta 5$  | +        | +              | +           | +              | +           |
| $\beta 5i$ | +++      | +++            | +++         | +++            | +++         |

Catalytic  $\beta$  subunits of 20S proteasomes isolated from colon of patients with IBD and control patients were compared and evaluated: - not detectable, + traces, ++ normal expression, +++ increased expression.

**Supplemental Figure 1**

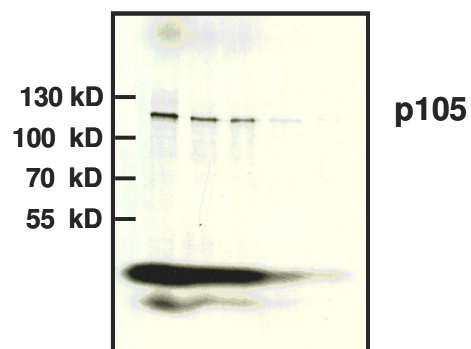

<sup>35</sup>S-labeled in vitro transcribed and translated p105 protein. In lanes 1-5, 2 $\mu$ g, 1  $\mu$ g, 0.5  $\mu$ g, 0,1  $\mu$ g and 0,01  $\mu$ g protein was loaded, respectively.

## Supplemental Figure 2

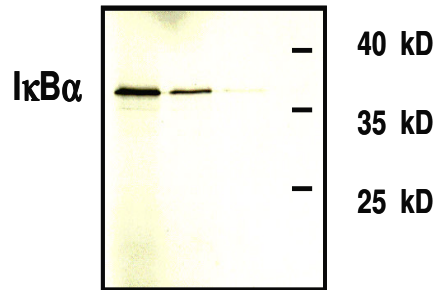

IκBα was in vitro transcribed with T7 RNA polymerase and translated in the presence of  $^{35}\text{S}$ -methionine using the TNT system. Purified protein was loaded in lanes 1-3 (2 μg, 1 μg and 0,5 mg protein, respectively).

## Supplemental Figure 3

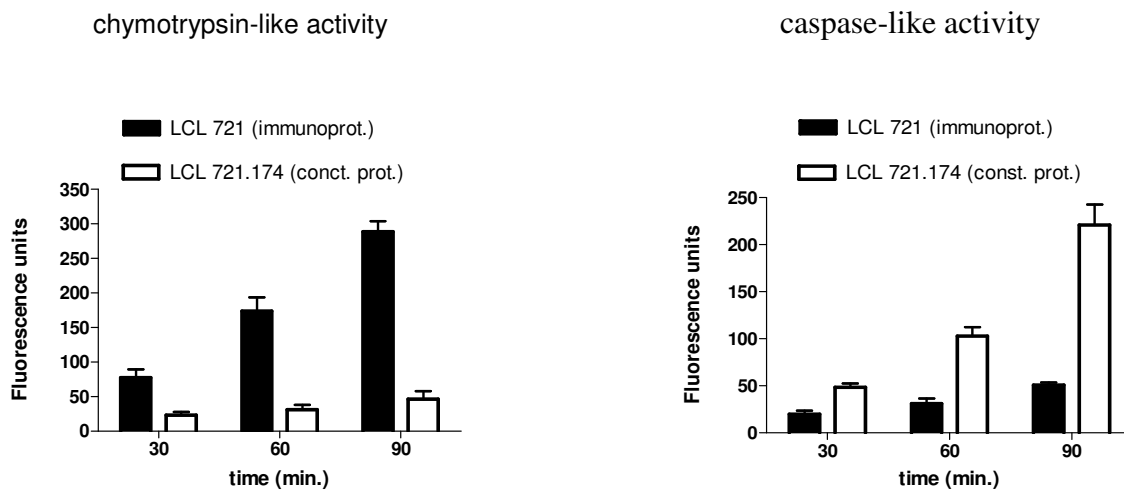

20S Proteasomes isolated from LCL 721 cell line containing high amount of immunoproteasomes behave like 20S proteasomes purified from intestinal mucosa of patients with Crohn`s disease with high chytotrypsin-like activity and very little caspase-like activity, whereas 20S proteasomes derived from LCL 721.174 cells can be classified as pure constitutive proteasomes showing high caspase-like activity. Means  $\pm$  s.e.m. of three independent experiments are shown.
